# Supplementary material for: Spontaneous formation of MoS2 nanoscrolls from flat monolayers with sulfur vacancies: a molecular dynamics investigation
Source: Royal Society of Chemistry journal article supplement (doi:10.1039/d3nr03407k), 2023-01-01
Supplement: d3nr03407k1.pdf [file d3nr03407k1.pdf]

## Supporting information

# Spontaneous Formation of MoS<sub>2</sub> Nanoscroll from Flat Monolayer with Sulfur Vacancies: A Molecular Dynamics Investigation

Ruhao Yang<sup>1</sup>, Han Ye<sup>1,\*</sup>, Naizhang Sun<sup>1</sup>, Wenjun Liu<sup>1</sup>

State Key Laboratory of Information Photonics and Optical Communications, Beijing  
University of Posts and Telecommunications, Beijing 100876, China

E-mails: Han\_ye@bupt.edu.cn (H.Y.)

Armchair nanoribbon with 20% vacancy density

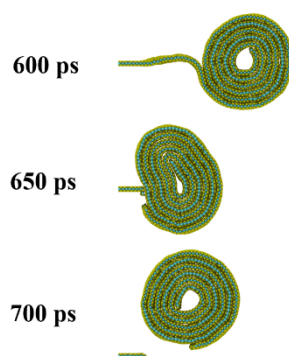

**Fig. S1** MD snapshots of the armchair nanoribbon with 20% vacancy density at 600 ps, 650 ps, and 700 ps.

Armchair nanoribbon with 35% vacancy density

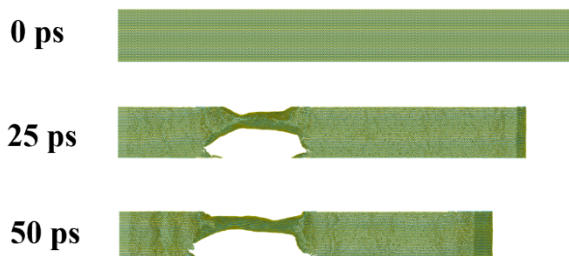

**Fig. S2** MD snapshots of the armchair nanoribbon with 35% vacancy density at 0 ps, 25 ps and 50 ps.

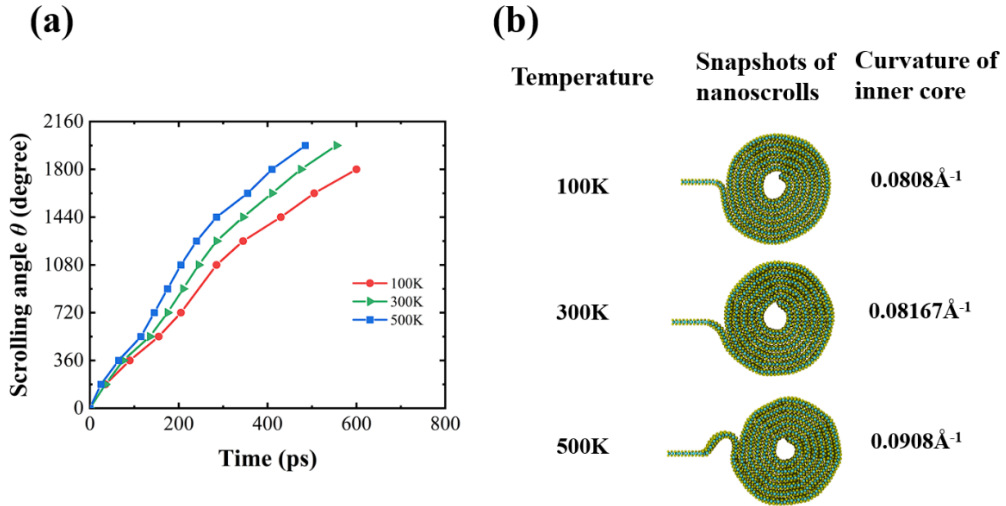

**Fig. S3** (a) The scrolling angle  $\theta$  with simulation time for zigzag nanoribbon with 15% sulfur vacancy at various simulation temperatures. (b) Structural snapshots of nanoscroll formation at various temperatures.

**Perfect MoS<sub>2</sub> nanoscrolls with different layer spacings**

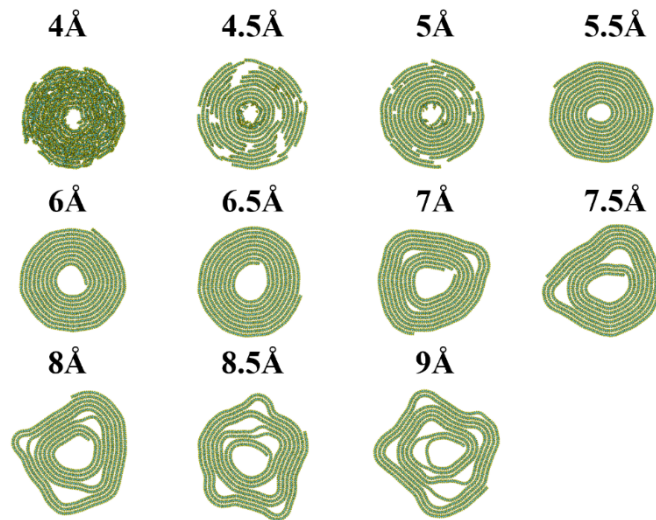

**Fig. S4** MD simulation of perfect MoS<sub>2</sub> nanoscrolls with varying layer spacing, ranging from 4 Å to 9 Å.

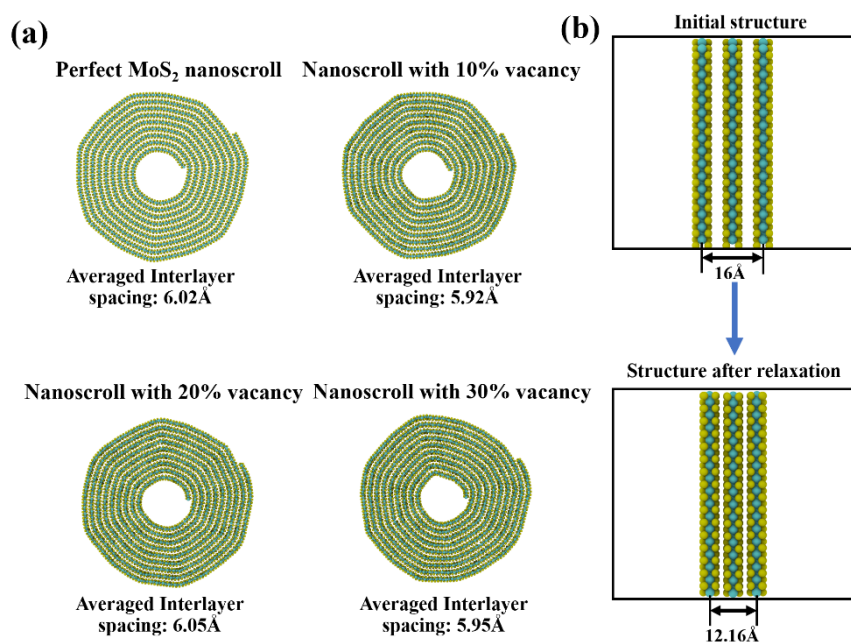

**Fig. S5** (a) MoS<sub>2</sub> nanoscrolls with varying sulfur vacancy densities. (b) Planar multilayer MoS<sub>2</sub>, before and after relaxation of interlayer spacing.
